# Supplementary material for: Evaluation of the Antibacterial Activities of Mangrove Honeybee Propolis Extract and the Identification of Transpeptidase and Transglycosylase as Targets for New Antibiotics Using Molecular Docking
Source: MDPI journal article supplement (doi:10.3390/antibiotics12071197), 2023-07-17

**Figure S1.** The pollen grain of *Avicennia marina* identified from under test propolis according the following reference:

-Suc, Jean-Pierre, Séverine Fauquette, and Speranta-Maria Popescu. "L'investigation palynologique du Cénozoïque passe par les herbiers." In Actes du Colloque "Les herbiers: un outil d'avenir. Tradition et modernité", Villeurbanne. Edit. Association française pour la Conservation des Espèces Végétales, Nancy, pp. 67-87. 2004.

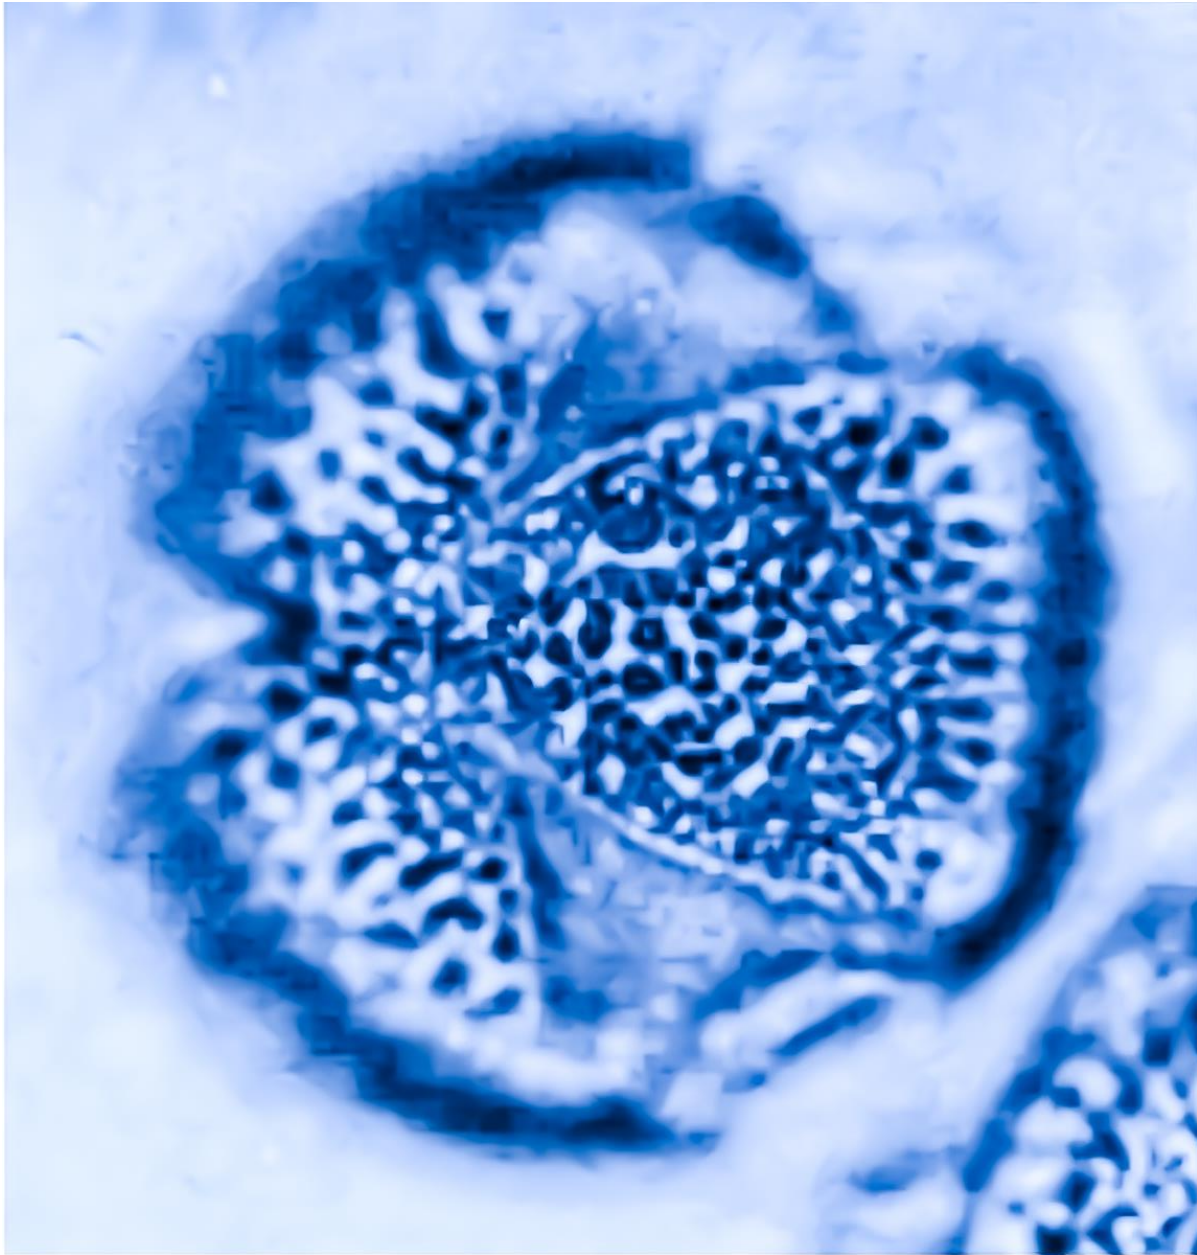

Supplement: s1 [file s1]
